# Supplementary material for: Novel Reporter for Faithful Monitoring of ERK2 Dynamics in Living Cells and Model Organisms
Source: PubMed Central journal article supplement (PMC4627772; doi:10.1371/journal.pone.0140924), 2015-10-30
Supplement: pone.0140924.s001.pdf [file pone.0140924.s001.pdf]

## Novel reporter for faithful monitoring of ERK2 dynamics in living cells and model organisms.

François Sipieter, Benjamin Cappe, Mariano Gonzalez Pisfil, Corentin Spriet, Jean-François Bodart, Katia Cailliau-Maggio, Peter Vandenabeele, Laurent Héliot, Franck B. Riquet.

### Plasmid Constructs

**pCS2-xMEK1-2A-GFP-xERK2:** The *Xenopus laevis* ERK2 sequence (xERK2) was amplified by polymerase chain reaction (PCR) using the forward primer xERK2.AgeI-BamHI-F (AgeI and BamHI sites underlined; start codon in bold), and the reverse primer xERK2.XhoI-R, (XhoI site underlined; stop codon in bold). To amplify eGFP from pEGFP-N1 (Clontech, USA), forward primer eGFP.AscI-F (AscI site underlined) and reverse primer eGFP.NheI-R (NheI site underlined) without stop codon were then designed. xERK2 and eGFP PCR products were purified, digested and ligated sequentially into the pCS2-7G backbone at the AgeI-XhoI and AscI-NheI sites, respectively, to create the intermediary vector pCS2-eGFP-7G-xERK2. We adopted a cassette-cloning strategy using the complementary oligonucleotides T2A.AscI-F and T2A.AscI-R to generate a double-stranded cassette containing the 2A peptide sequence derived from the *Thosea asigna* virus (*italic*) and two unique restriction sites, SpeI and ClaI (underlined). The resulting cassette flanked by AscI overhangs was then ligated into the pCS2-eGFP-7G-xERK2 vector at the AscI site to create the control vector pCS2-2A-eGFP-7G-xERK2. The *Xenopus laevis* MEK1 sequence (xMEK1) was then obtained by two-step PCR from five stage-8 blastula embryos. Poly(A)+ RNA was reverse transcribed into cDNA, and after first-strand synthesis, the cDNA was used as a template for the PCR step. xMEK1 was amplified by PCR using the forward primer xMEK1.SpeI-F and the reverse primer xMEK1.ClaI-R, containing SpeI and ClaI sites, respectively (underlined). The PCR product was ligated into the SpeI and ClaI sites in the T2A cassette to produce the final expression vector pCS2-xMEK1-2A-eGFP-7G-xERK2. Note that the Gly-Ser-Gly (GSG) linker between MEK1 and the T2A sequences was maintained to optimize cleavage efficiency [1,2].

**pCS2-mMEK1-2A-GFP-rERK2:** The eGFP-rERK2 sequence from peGFP-C1-rERK2 was obtained by digestion with NheI and BamHI restriction enzymes. eGFP-rERK2 was then purified and ligated into the NheI and BamHI sites in the pCS2-7G backbone to create the expression vector pCS2-eGFP-rERK2. The *Mus musculus* MEK1 (mMEK1) sequence was obtained using the procedure described above for xMEK1, using 100 ng of total RNA extracted from NIH-3T3 cells. mMEK1 was amplified by PCR using the forward primer mMEK1.SpeI-F and the reverse primer mMEK1.ClaI-R, containing SpeI and ClaI sites,

respectively (underlined). The PCR product was ligated into the *SpeI* and *ClaI* sites in the previously constructed pCS2-2A-eGFP-7G-xERK2 to produce the intermediary vector pCS2-mMEK1-2A-eGFP-7G-xERK2. The mMEK1-2A fragment was excised from the intermediary vector using *AsclI*, purified, and ligated in frame to the corresponding restriction site in linearized pCS2-eGFP-rERK2 to create the final expression vector pCS2-mMEK1-2A-eGFP-rERK2.

**pCS2-mCherry-mMEK1-2A-GFP-rERK2:** The peGFP-N1 vector was digested with *AgeI* and *NotI* to remove the eGFP sequence, and then filled in with Klenow and re-ligated. The resulting vector was cut with *NheI* and a cassette containing a 7-glycine linker (*italic*) and two unique restriction sites, *AgeI* and *BsrGI* (underlined), were inserted in the *NheI* site, producing pClontech-N1-7G. The forward and reverse complementary oligonucleotides used to create the cassette were Backbone-7G-F2 and Backbone-7G-R2. The mCherry sequence from pmCherry-N1 vector was then subcloned into the *AgeI* and *BsrGI* restriction sites of pClontech-N1-7G to generate the pClontech-7G-mCherry intermediary vector. pClontech-N1-7G-mCherry and pCS2-mMEK1-2A-eGFP-rERK2 were digested with *NheI* and *SpeI*, respectively, and incubated with Mung Bean Nuclease to create blunt-ends extremities. The resulting 7G-mCherry fragment was ligated into pCS2-mMEK1-2A-eGFP-rERK2, producing the final expression vector pCS2-mCherry-mMEK1-2A-eGFP-rERK2.

**pmCherry-7G-mMEK1:** The pmCherry-C1 vector was cut with *BspEI* and *XhoI*. Complementary oligonucleotides Backbone-7G-F3 and Backbone-7G-R3 were annealed to each other to generate a double-stranded cassette containing a 7-glycine linker (*italic*) and two unique restriction sites, *SpeI* and *AsclI* (underlined). The cassette flanked by *BspEI* and *XhoI* overhangs was then ligated into the pmCherry-C1 at *BspEI* and *XhoI* sites to create the pmCherry-C1-7G intermediary vector. mMEK1 was amplified by PCR using the forward primer mMEK1.SpeI-F2, incorporating a *SpeI* site (underlined) and a stop codon (**bold**), and the reverse primer mMEK1.AsclI-R (*AsclI* site underlined). The PCR product was ligated into pmCherry-C1-7G at the *SpeI* and *AsclI* sites, producing the final expression vector pmCherry-C1-7G-mMEK1.

1. Minskaia E, Ryan MD. Protein coexpression using FMDV 2A: effect of “linker” residues. *Biomed Res Int.* 2013;2013: 291730. doi:10.1155/2013/291730
2. Yu KK, Aguilar K, Tsai J, Galimidi R, Gnanapragasam P, Yang L, et al. Use of mutated self-cleaving 2A peptides as a molecular rheostat to direct simultaneous formation of membrane and secreted anti-HIV immunoglobulins. *PLoS One.* 2012;7: e50438. doi:10.1371/journal.pone.0050438
